# Supplementary material for: USP1 Regulates TAZ Protein Stability Through Ubiquitin Modifications in Breast Cancer
Source: MDPI journal article supplement (doi:10.3390/cancers12113090), 2020-10-23
Supplement: s1 [file s1]

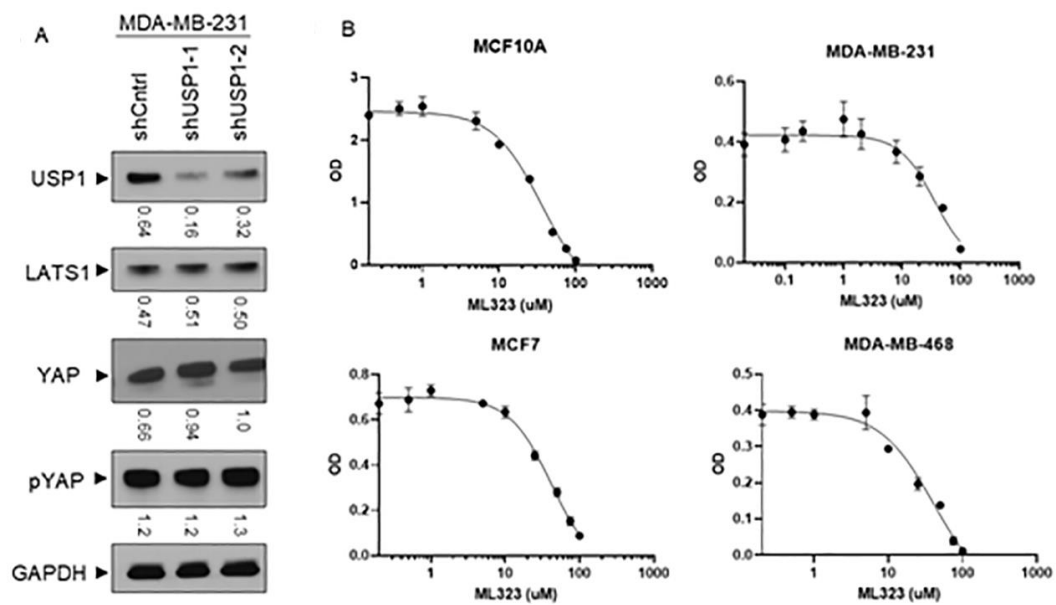

**Figure S1.** (A) Western blot analysis of MDA-MB-231 cells with USP1 knockdown and analysis for indicated antibodies. GAPDH was used as a loading control and blots were normalized to GAPDH. (B) Cytotoxicity experiments using 4 different cell lines and varying concentrations of ML323 (USP1/UAF1i).

## TAZ Amino Acid Conservation

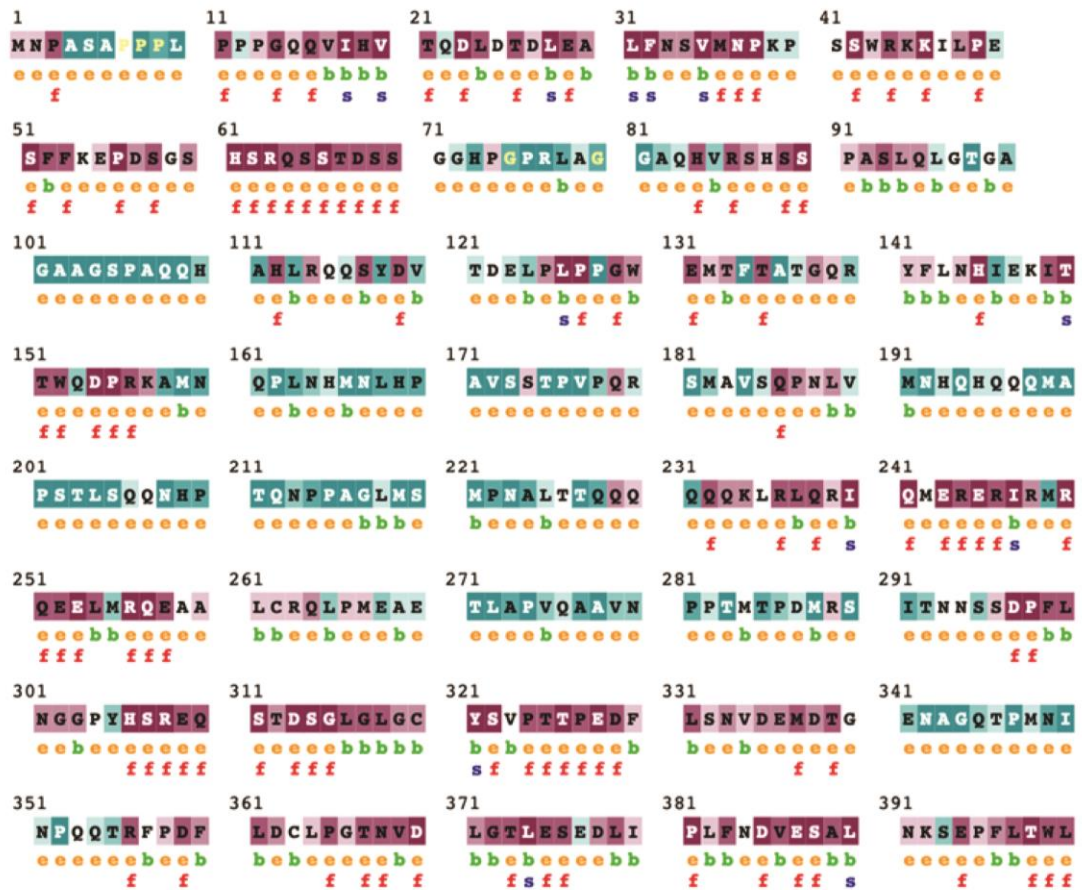

The conservation scale:

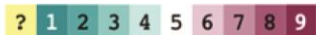

Variable Average Conserved

- o - An exposed residue according to the neural-network algorithm.
- b - A buried residue according to the neural-network algorithm.
- f - A predicted functional residue (highly conserved and exposed).
- s - A predicted structural residue (highly conserved and buried).
- Y - Insufficient data - the calculation for this site was performed on less than 10% of the sequences.

Figure S2. TAZ conservation across species.

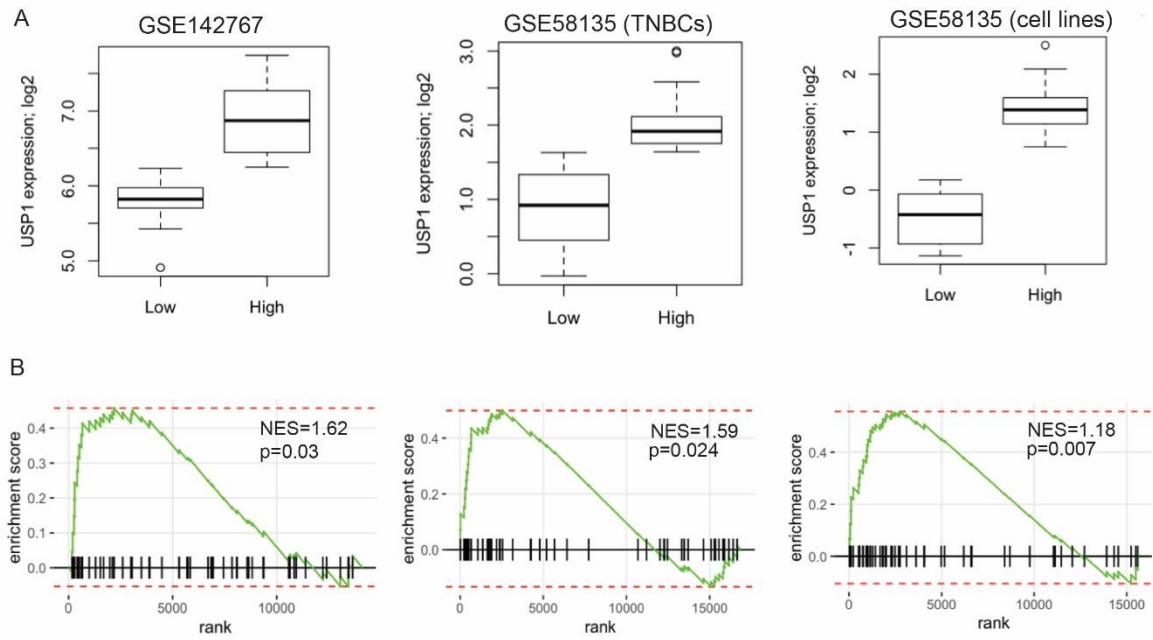

**Figure S3.** Stratification of GSE58135 (TNBCs), GSE58135 (Cell lines), and GSE142767 into USP1 low and USP1 high subsets. Cordenosi YAP/TAZ gene signature is shown.

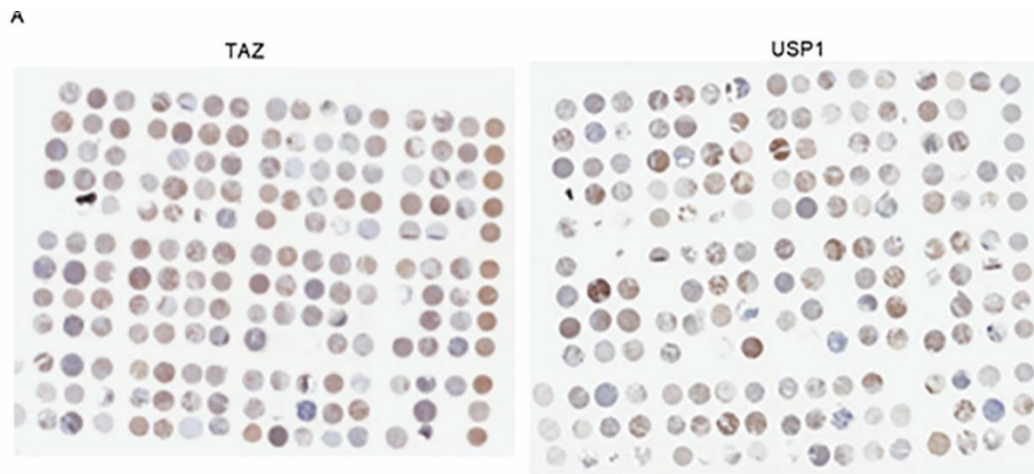

**Figure S4.** Representative images of TMAs stained with USP1 or TAZ antibody.

Details of Western Blot

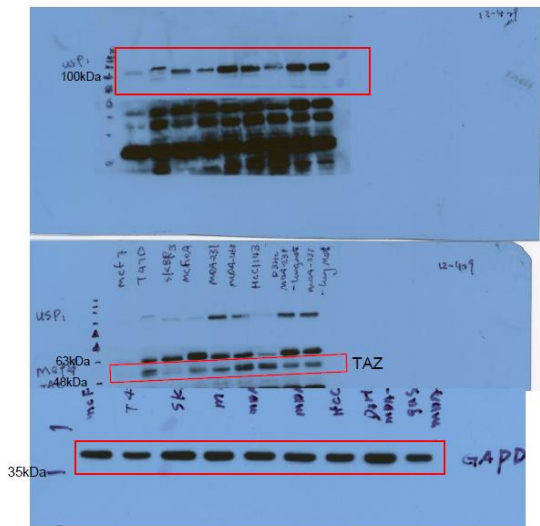

Figure 1D: Breast Cell panel

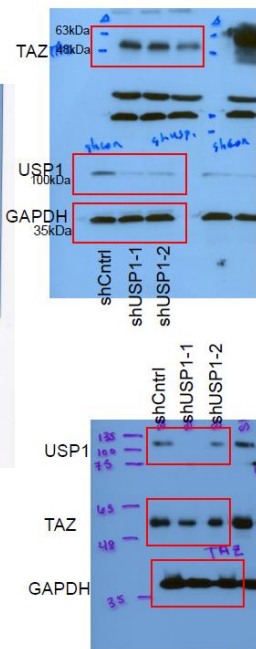

Figure 2A: shUSP1 in MCF10A

Figure 2A: shUSP1 in MDA-MB-231

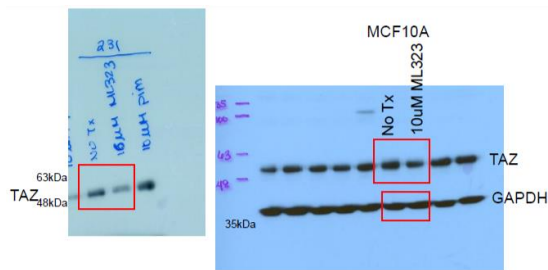

Figure 2C: ML323 treatment

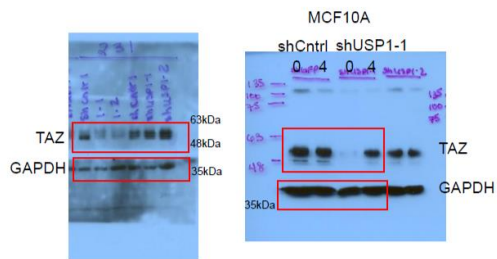

Figure 2D: MG132 TX

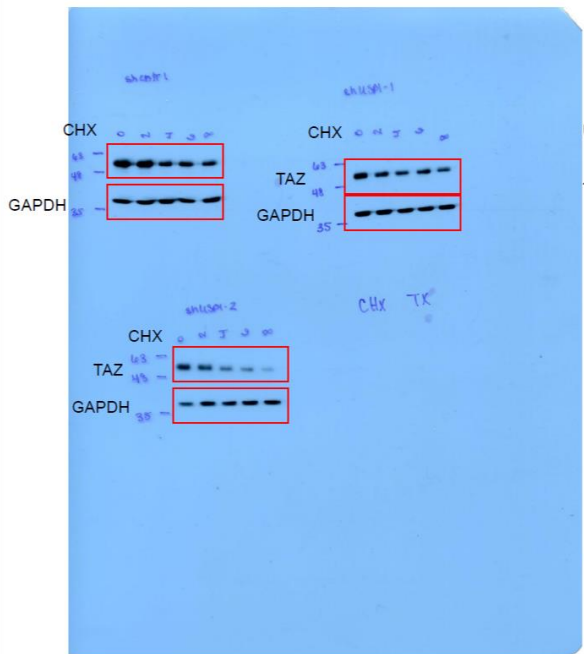

Figure 2E: CHX TX in shUSP1 MDA-MB-231

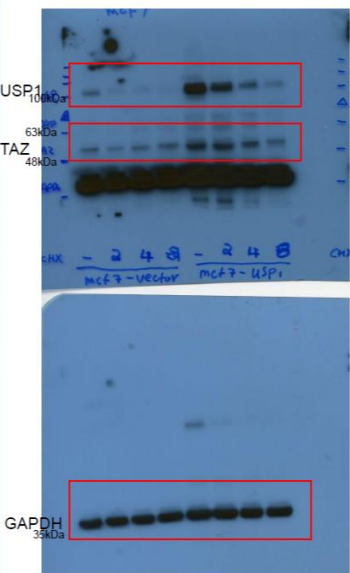

Figure 2F: CHX TX in OEUSP1 MCF7

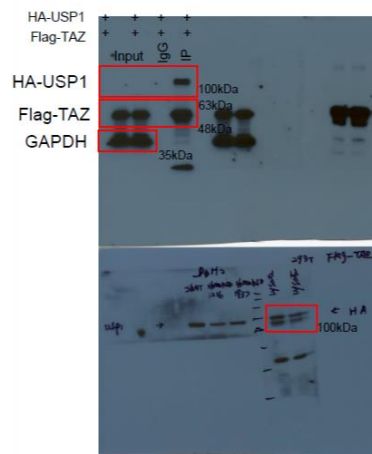

Figure 3A: Flag-TAZ\_Flag-IP

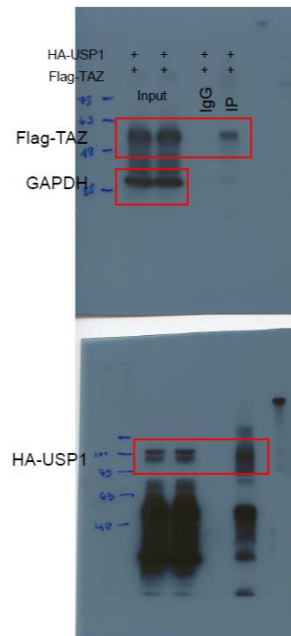

Figure 3A: HA-USP1\_HA-IP

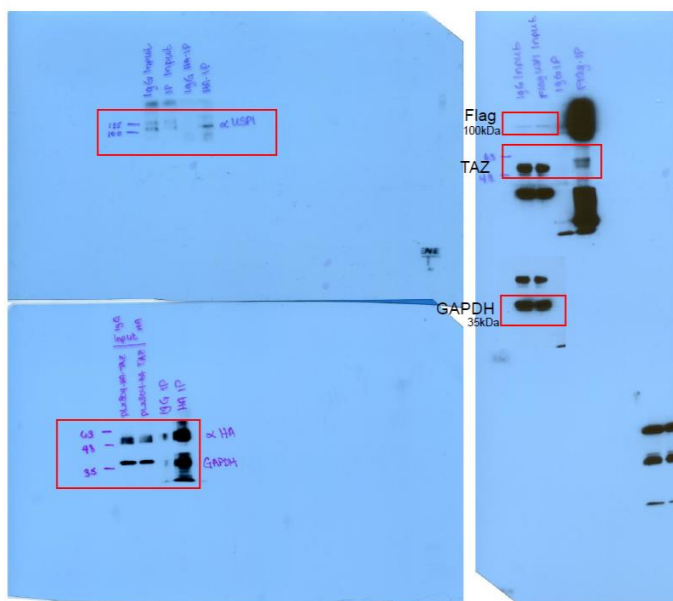

Figure 3B: Original\_Exogenous with endogenous interaction

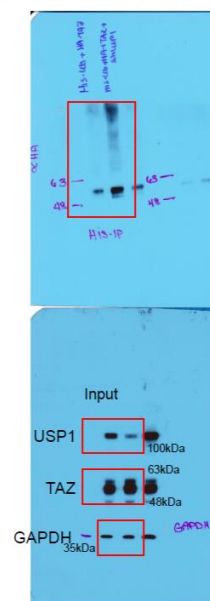

Figure 3C: Original (His-IP of TAZ-Ub with and without USP1)

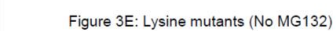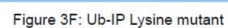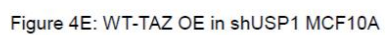



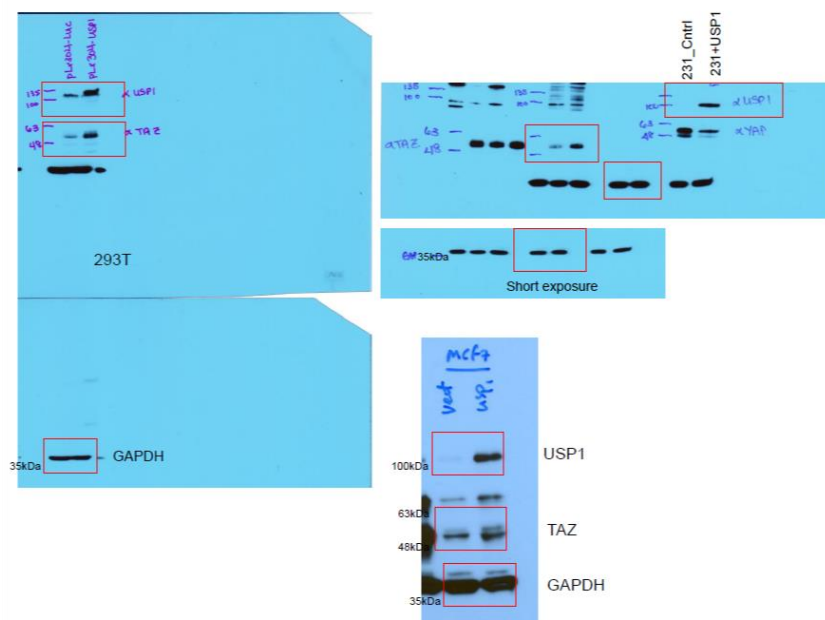

Figure 5A: USP1 OE in 293T, MDA-MB-231, and MCF7

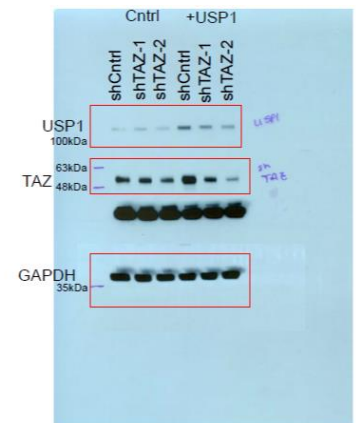

Figure 5E: shTAZ in USP1-OE MDA-MB-231

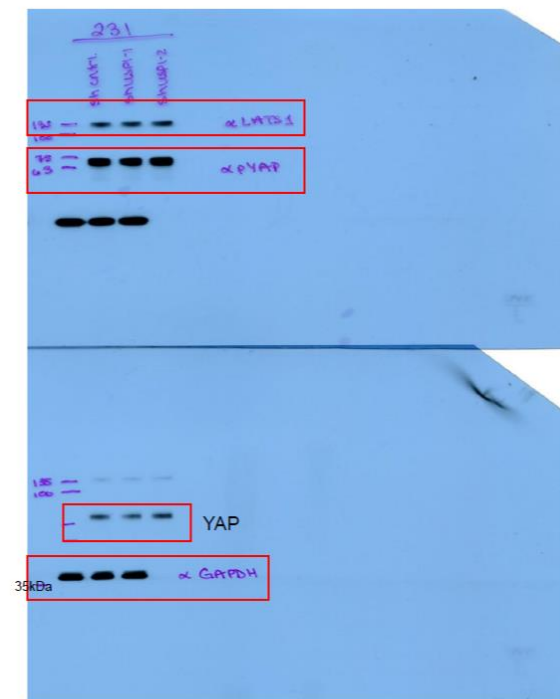

S1A: shUSP1 in MDA-MB-231 Hippo genes
